# Supplementary material
Source: ML conference proceedings conference paper supplement (https://openreview.net/forum?id=d7W4H0sTXU)
Supplement: supplementary_material [file attachment]

reward of the learned policy

MNIST, K=10, d=784

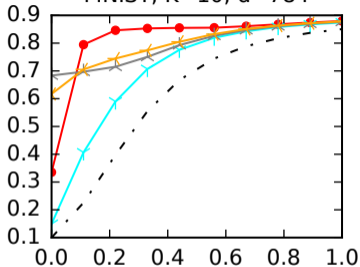

FashionMNIST, K=10, d=784

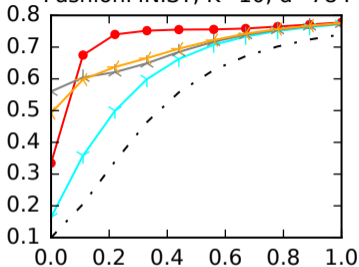

inverse-temperature parameter  $\eta_0$

inverse-temperature parameter  $\eta_0$

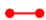

Ours

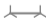

Sakhi et al. 1

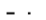

Logging

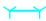

London et al.

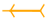

Sakhi et al. 2
